# Supplementary material
Source: PubMed Central journal article supplement (PMC4255908)
Supplement: NIHMS595881-supplement-supplementalmaterial.pdf [file NIHMS595881-supplement-supplementalmaterial.pdf]

## Wavelet Algorithms

The wavelet calculations were completed using Fourier transforms. The exact algorithm is given below in Mathematica code. The `FourierConvolve[]` function performs a circular convolution of two signals using the convolution theorem. The `ScaleWavelet[f, n, s]` function takes a wavelet function  $f$ , an ideal length  $n$ , and a stretch  $s$ , and returns the wavelet as a signal of length  $n$  stretched by  $s$ . The function `CWT[signal, f, s0, ds, S]` takes the signal, wavelet function  $f$ , and variables  $s_0$ ,  $ds$ , and  $S$ , and returns the continuous wavelet transform of the signal with wavelets scaled according to the formula in Equation S1.

$$s_k = s_0 2^{kds}, \quad k = 0, 1, \dots, S-1 \quad (\text{S1})$$

For the wavelets used in this paper, the values  $s_0=100$ ,  $ds=1/8$ , and  $S=60$  were used, and all values were measured in picoseconds.

```
FourierConvolve[a_List, b_List] :=
  Times[Sqrt[Length[a]],
    InverseFourier[
      Times[
        Fourier[a, FourierParameters -> {0, -1}],
        Fourier[b, FourierParameters -> {0, -1}]],
      FourierParameters -> {0, -1}]];
ScaleWavelet[wltfunc_, n_Integer, scale_] :=
  Times[
    1/Sqrt[scale],
    Table[N[wltfunc[k/scale]], {k, -Floor[n/2], Floor[(n - 1)/2]}]];
CWT[signal_List, wltfunc_, s0_, ds_, S_Integer] :=
  Module[{n = Length[signal], scales = Table[s0*2^(k*ds), {k, 0, S - 1}]},
    Map[
      FourierConvolve[
        signal,
        RotateLeft[ScaleWavelet[wltfunc, n, #], Floor[n/2]]] &,
      scales]];
Morlet[t_] := Pi^(-1/4)*Exp[-t^2/2]*Exp[2*Pi*I*t];
Paul[t_] := 8*Sqrt[2/(35*Pi)]*(1 - I*t)^(-5);
```

For example, if a the variable  $x$  contained the  $x$ -coordinate of an atom over time, then the continuous wavelet transform using the Paul wavelet as described in this paper could be obtained with the command `wlt=CWT[x, Paul, 105, 1/8, 60]`. The value of `wlt[[1]]` is the

wavelet coefficient vector with a scale of 105 ps while the value of `wlt[[41]]` is the wavelet coefficient vector with a scale of  $105 \cdot 2^{40/8} = 3.36$  ns.

Once the wavelet coordinates are collected, significance testing is performed using the algorithm below. The `WaveletSignificance[wlt, scales, x, pval, correction]` function returns the wavelength of the frequency most strongly matched by the model described in this paper. The `wlt` parameter is the wavelet coordinates as generated by the `CWT[]` function while the `scales` variable should be a list of the scales calculated in `CWT[]`. The `x` parameter is the same as that passed to `CWT[]` while the `pval` is the minimum  $p$ -value acceptable for the significance test. Finally the `correction` parameter is the scale-to-wavelength factor described in the paper (1.01 for Morlet, 1.389 for Paul).

```
WaveletSignificance[wlt_List, scales_List, x_List, pval_, correction_] :=
Module[
  {n = Length[wlt[[1]]],
   chival = (InverseCDF[ChiSquareDistribution[2], t] /. t -> (1 - pval))/2,
   res = Table[{0, 0}, {Length[wlt[[1]]}],
   var = Variance[x],
   tmp, min},
Scan[
  Function[{s},
    min = (0.00647*(correction*scales[[s]])^1.41344 + 19.7527)*chival;
    res = Table[
      (tmp = Abs[wlt[[s, k]]]^2/var;
       If[res[[k, 2]] < tmp && min < tmp,
         {correction*scales[[s]], tmp},
         res[[k]])],
      {k, 1, n}],
    Range[1, Length[scales]]];
  First[Transpose[res]]];
```

Note that in the case of a wavelet with no imaginary part, the fourth line would be as follows.

```
chival = (InverseCDF[ChiSquareDistribution[1], t] /. t -> (1 - pval)),
```

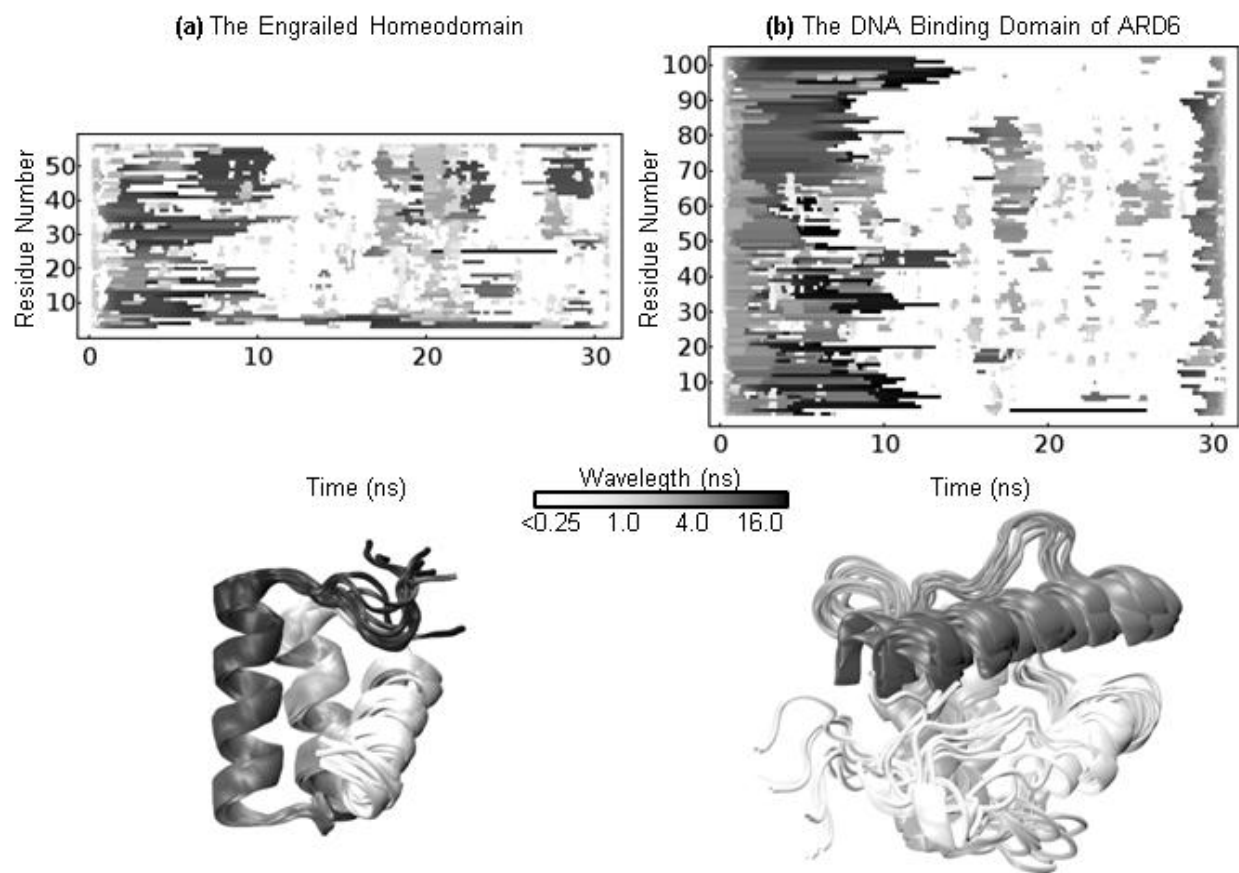

**Figure S1.** Comparison of the engrailed homeodomain (a) to the DNA-binding domain of ARD6 (b).
